# Supplementary material for: Translatable mitochondria-targeted protection against programmed cardiovascular dysfunction
Source: PubMed Central journal article supplement (PMC7438086; doi:10.1126/sciadv.abb1929), 2020-08-19
Supplement: abb1929_SM.pdf [file abb1929_SM.pdf]

## Supplementary Materials for

### **Translatable mitochondria-targeted protection against programmed cardiovascular dysfunction**

K. J. Botting, K. L. Skeffington, Y. Niu, B. J. Allison, K. L. Brain, N. Itani, C. Beck,  
A. Logan, A. J. Murray, M. P. Murphy, D. A. Giussani\*

\*Corresponding author. Email: dag26@cam.ac.uk

Published 19 August 2020, *Sci. Adv.* **6**, eabb1929 (2020)  
DOI: 10.1126/sciadv.abb1929

#### **This PDF file includes:**

Tables S1 and S2  
Fig. S1

**SUPPLEMENTARY MATERIAL**

**Table S1. Blood gas status**

| <b>A. Acute hypoxia – Fetal and maternal arterial blood gas measurements</b> |             |        |               |               |               |               |               |               |               |               |
|------------------------------------------------------------------------------|-------------|--------|---------------|---------------|---------------|---------------|---------------|---------------|---------------|---------------|
|                                                                              |             |        | Normoxia      |               |               | Acute hypoxia |               |               | Recovery      |               |
|                                                                              |             |        | N0            | N45           | N75           | H5            | H15           | H30           | R30           | R60           |
| pH                                                                           | Fetal CA    | Saline | 7.39 ± 0.01   | 7.37 ± 0.01   | 7.37 ± 0.01   | 7.33 ± 0.01*  | 7.29 ± 0.01*  | 7.25 ± 0.02*  | 7.28 ± 0.02*  | 7.32 ± 0.01*  |
|                                                                              |             | MitoQ  | 7.36 ± 0.01   | 7.36 ± 0.01   | 7.35 ± 0.01   | 7.33 ± 0.01*  | 7.29 ± 0.01*  | 7.28 ± 0.01*  | 7.31 ± 0.01*  | 7.33 ± 0.01*  |
|                                                                              | Fetal FA    | Saline | 7.38 ± 0.01   | 7.37 ± 0.01   | 7.37 ± 0.01   | 7.34 ± 0.01*  | 7.29 ± 0.01*  | 7.24 ± 0.02*  | 7.29 ± 0.01*  | 7.31 ± 0.01*  |
|                                                                              |             | MitoQ  | 7.37 ± 0.01   | 7.35 ± 0.01   | 7.35 ± 0.01   | 7.34 ± 0.01*  | 7.30 ± 0.01*  | 7.26 ± 0.01*  | 7.31 ± 0.01*  | 7.32 ± 0.01*  |
|                                                                              | Maternal FA | Saline | 7.51 ± 0.01   | 7.52 ± 0.01   | 7.51 ± 0.01   | 7.45 ± 0.01   | 7.44 ± 0.02*  | 7.44 ± 0.02*  | 7.48 ± 0.02   | 7.50 ± 0.01   |
|                                                                              |             | MitoQ  | 7.49 ± 0.01   | 7.49 ± 0.01   | 7.49 ± 0.01   | 7.47 ± 0.01   | 7.44 ± 0.01*  | 7.47 ± 0.01*  | 7.50 ± 0.01   | 7.50 ± 0.01   |
| PaCO <sub>2</sub><br>(mmHg)                                                  | Fetal CA    | Saline | 49.30 ± 1.38  | 51.60 ± 1.29  | 50.80 ± 1.53  | 54.20 ± 0.86  | 53.80 ± 1.77  | 53.40 ± 2.86  | 50.40 ± 1.44  | 50.60 ± 1.96  |
|                                                                              |             | MitoQ  | 52.00 ± 0.65  | 51.80 ± 1.32  | 52.60 ± 0.87  | 55.20 ± 1.11  | 55.60 ± 0.51  | 54.80 ± 2.40  | 51.60 ± 1.69  | 53.00 ± 2.02  |
|                                                                              | Fetal FA    | Saline | 52.83 ± 0.59  | 53.00 ± 1.41  | 54.67 ± 1.12  | 56.20 ± 1.02  | 57.67 ± 1.33* | 58.50 ± 1.48* | 52.00 ± 1.41  | 54.33 ± 1.96  |
|                                                                              |             | MitoQ  | 54.08 ± 0.66  | 56.00 ± 1.41  | 55.67 ± 0.84  | 56.50 ± 0.62  | 60.00 ± 1.13* | 57.17 ± 1.56* | 53.33 ± 1.36  | 56.50 ± 1.67  |
|                                                                              | Maternal FA | Saline | 34.42 ± 0.62  | 33.83 ± 0.70  | 35.67 ± 0.67  | 39.40 ± 1.72  | 40.33 ± 0.61  | 39.83 ± 0.79  | 36.83 ± 1.45  | 35.50 ± 1.18  |
|                                                                              |             | MitoQ  | 36.33 ± 0.77  | 35.83 ± 0.54  | 37.00 ± 1.00  | 39.50 ± 0.67  | 41.33 ± 0.80  | 39.17 ± 1.40  | 36.17 ± 1.28  | 37.00 ± 1.46  |
| PaO <sub>2</sub><br>(mmHg)                                                   | Fetal CA    | Saline | 24.00 ± 1.52  | 22.40 ± 1.81  | 22.20 ± 2.08  | 14.60 ± 0.93* | 13.00 ± 0.58* | 12.80 ± 0.49* | 25.60 ± 1.36  | 23.80 ± 1.43  |
|                                                                              |             | MitoQ  | 24.10 ± 1.07  | 22.00 ± 2.68  | 24.20 ± 1.96  | 14.00 ± 0.89* | 13.75 ± 0.48* | 13.60 ± 0.24* | 25.00 ± 1.47  | 24.80 ± 2.80  |
|                                                                              | Fetal FA    | Saline | 20.25 ± 1.13  | 19.50 ± 1.78  | 19.00 ± 2.02  | 10.50 ± 0.81* | 11.00 ± 0.82* | 10.83 ± 0.48* | 22.17 ± 1.47  | 20.50 ± 0.96  |
|                                                                              |             | MitoQ  | 20.42 ± 1.50  | 19.67 ± 1.33  | 19.83 ± 1.14  | 11.17 ± 1.08* | 10.17 ± 0.75* | 11.00 ± 0.52* | 20.83 ± 1.58  | 18.67 ± 1.17  |
|                                                                              | Maternal FA | Saline | 99.67 ± 3.85  | 100.67 ± 2.70 | 97.50 ± 3.92  | 41.17 ± 7.54* | 33.58 ± 2.15* | 31.00 ± 2.13* | 97.00 ± 3.84  | 100.67 ± 6.58 |
|                                                                              |             | MitoQ  | 101.33 ± 1.89 | 114.33 ± 7.66 | 103.00 ± 3.94 | 35.80 ± 3.43* | 34.50 ± 2.54* | 33.83 ± 2.65* | 110.33 ± 4.92 | 105.00 ± 3.30 |
| SatHb<br>(%)                                                                 | Fetal CA    | Saline | 69.18 ± 0.80  | 65.05 ± 4.36  | 65.18 ± 2.66  | 34.18 ± 4.40* | 29.63 ± 2.72* | 23.83 ± 2.80* | 72.10 ± 2.08  | 68.78 ± 2.44  |
|                                                                              |             | MitoQ  | 74.38 ± 5.91  | 76.68 ± 9.45  | 70.98 ± 4.25  | 33.57 ± 4.83* | 26.20 ± 0.83* | 25.13 ± 3.61* | 67.88 ± 2.16  | 71.13 ± 4.80  |
|                                                                              | Fetal FA    | Saline | 62.71 ± 2.93  | 56.08 ± 3.80  | 58.12 ± 3.53  | 24.54 ± 2.41* | 19.74 ± 2.50* | 19.92 ± 3.32* | 62.80 ± 3.01  | 57.70 ± 2.55* |
|                                                                              |             | MitoQ  | 62.08 ± 2.40  | 59.02 ± 0.77  | 59.71 ± 1.62  | 25.56 ± 3.09* | 21.36 ± 2.74* | 20.46 ± 2.36* | 59.78 ± 0.68  | 52.22 ± 1.90* |
|                                                                              | Maternal FA | Saline | 103.88 ± 0.54 | 104.16 ± 0.67 | 103.38 ± 0.98 | 56.74 ± 5.23* | 54.68 ± 6.07* | 49.12 ± 5.61* | 103.52 ± 1.10 | 102.08 ± 1.27 |
|                                                                              |             | MitoQ  | 103.62 ± 0.71 | 104.00 ± 0.54 | 103.62 ± 0.79 | 63.04 ± 5.64* | 59.84 ± 7.27* | 56.08 ± 4.29* | 104.32 ± 0.48 | 103.90 ± 0.83 |

|                             |             |        |              |              |              |              |               |               |              |              |
|-----------------------------|-------------|--------|--------------|--------------|--------------|--------------|---------------|---------------|--------------|--------------|
| Hb<br>(g.dL <sup>-1</sup> ) | Fetal CA    | Saline | 9.36 ± 0.34  | 9.18 ± 0.40  | 8.78 ± 0.24  | 10.50 ± 0.31 | 10.15 ± 0.32  | 10.43 ± 0.13  | 8.98 ± 0.39  | 8.93 ± 0.41  |
|                             |             | MitoQ  | 8.39 ± 0.49  | 8.40 ± 0.43  | 8.33 ± 0.31  | 9.25 ± 0.34  | 9.38 ± 0.23   | 9.28 ± 0.26   | 8.00 ± 0.23  | 7.95 ± 0.41  |
|                             | Fetal FA    | Saline | 9.75 ± 0.50  | 9.80 ± 0.44  | 9.90 ± 0.45  | 10.68 ± 0.28 | 10.56 ± 0.39  | 10.55 ± 0.23  | 9.24 ± 0.48  | 9.38 ± 0.47  |
|                             |             | MitoQ  | 8.61 ± 0.43† | 8.54 ± 0.34† | 8.54 ± 0.32† | 9.42 ± 0.25† | 9.30 ± 0.33†  | 9.30 ± 0.22†  | 8.26 ± 0.29† | 8.40 ± 0.27† |
|                             | Maternal FA | Saline | 10.57 ± 0.17 | 10.18 ± 0.30 | 10.38 ± 0.20 | 12.60 ± 0.37 | 12.72 ± 0.26* | 13.56 ± 0.34* | 10.40 ± 0.32 | 9.72 ± 0.45  |
|                             |             | MitoQ  | 10.37 ± 0.44 | 10.46 ± 0.44 | 10.48 ± 0.39 | 11.76 ± 0.39 | 12.70 ± 0.35* | 12.22 ± 0.37  | 10.78 ± 0.58 | 10.68 ± 0.43 |

### B. Chronic hypoxia - maternal arterial blood gas measurements

|                             |          |        | Gestational age (d) |                |               |               |               |               |               |               |
|-----------------------------|----------|--------|---------------------|----------------|---------------|---------------|---------------|---------------|---------------|---------------|
|                             |          |        | 105                 | 106            | 110           | 115           | 120           | 125           | 130           | 135           |
| pHa                         | Normoxia | Saline | 7.50 ± 0.01         | 7.51 ± 0.01    | 7.50 ± 0.01   | 7.49 ± 0.01   | 7.49 ± 0.01   | 7.49 ± 0.01   | 7.48 ± 0.01   | 7.50 ± 0.01   |
|                             |          | MitoQ  | 7.50 ± 0.01         | 7.49 ± 0.01    | 7.49 ± 0.01   | 7.49 ± 0.01   | 7.49 ± 0.01   | 7.49 ± 0.01   | 7.49 ± 0.01   | 7.48 ± 0.01†  |
|                             | Hypoxia  | Saline | 7.50 ± 0.01         | 7.54 ± 0.01*   | 7.51 ± 0.01   | 7.51 ± 0.01   | 7.51 ± 0.01   | 7.50 ± 0.01   | 7.51 ± 0.01   | 7.50 ± 0.01   |
|                             |          | MitoQ  | 7.50 ± 0.01         | 7.52 ± 0.01*   | 7.52 ± 0.01   | 7.50 ± 0.01   | 7.50 ± 0.01   | 7.50 ± 0.01   | 7.50 ± 0.01   | 7.49 ± 0.01†  |
| PaCO <sub>2</sub><br>(mmHg) | Normoxia | Saline | 34.37 ± 0.56        | 35.78 ± 0.69   | 35.24 ± 0.81  | 37.00 ± 1.26  | 38.00 ± 1.40  | 36.69 ± 1.29  | 38.09 ± 1.53  | 38.07 ± 1.04  |
|                             |          | MitoQ  | 34.11 ± 0.40        | 31.33 ± 1.71   | 33.93 ± 0.31  | 33.70 ± 0.31  | 34.34 ± 0.37  | 34.28 ± 0.31  | 34.41 ± 0.39  | 34.97 ± 0.41  |
|                             | Hypoxia  | Saline | 33.66 ± 0.41        | 27.95 ± 0.56*  | 27.96 ± 0.28* | 29.63 ± 0.35* | 29.64 ± 0.37* | 30.41 ± 0.77* | 30.24 ± 0.36* | 29.84 ± 0.40* |
|                             |          | MitoQ  | 33.37 ± 0.30        | 29.10 ± 1.05*  | 29.04 ± 0.21* | 30.17 ± 0.26* | 30.03 ± 0.36* | 30.10 ± 0.31* | 30.12 ± 0.40* | 30.44 ± 0.39* |
| PaO <sub>2</sub><br>(mmHg)  | Normoxia | Saline | 101.77 ± 2.25       | 101.00 ± 2.31  | 107.28 ± 3.07 | 108.08 ± 1.86 | 105.89 ± 2.96 | 109.73 ± 4.85 | 102.11 ± 2.25 | 101.73 ± 2.86 |
|                             |          | MitoQ  | 102.37 ± 1.45       | 123.60 ± 9.40† | 107.50 ± 1.30 | 106.94 ± 1.64 | 106.88 ± 1.47 | 106.47 ± 1.65 | 106.57 ± 1.80 | 101.45 ± 1.54 |
|                             | Hypoxia  | Saline | 105.59 ± 1.78       | 51.67 ± 2.02*  | 48.59 ± 1.04* | 46.24 ± 0.73* | 46.96 ± 0.66* | 46.44 ± 0.62* | 46.77 ± 0.75* | 45.22 ± 0.72* |
|                             |          | MitoQ  | 105.33 ± 1.74       | 62.95 ± 1.63*† | 52.08 ± 0.63* | 47.83 ± 0.39* | 47.53 ± 0.46* | 48.06 ± 0.56* | 47.23 ± 0.49* | 48.01 ± 0.46* |
| Sat Hb<br>(%)               | Normoxia | Saline | 103.08 ± 0.32       | 103.05 ± 0.50  | 103.70 ± 0.58 | 103.74 ± 0.47 | 104.62 ± 0.54 | 103.88 ± 0.53 | 104.37 ± 0.71 | 103.89 ± 0.62 |
|                             |          | MitoQ  | 102.03 ± 0.32       | 103.42 ± 0.58  | 102.49 ± 0.21 | 102.43 ± 0.31 | 102.93 ± 0.17 | 102.83 ± 0.26 | 102.64 ± 0.24 | 101.93 ± 0.34 |
|                             | Hypoxia  | Saline | 101.45 ± 1.48       | 85.74 ± 2.03*  | 81.67 ± 1.04* | 80.21 ± 0.99* | 80.30 ± 1.03* | 79.34 ± 1.35* | 80.98 ± 0.87* | 78.58 ± 1.11* |
|                             |          | MitoQ  | 101.70 ± 1.42       | 95.34 ± 0.90*  | 86.71 ± 0.67* | 83.28 ± 0.69* | 82.51 ± 0.83* | 82.04 ± 0.88* | 82.55 ± 1.04* | 82.89 ± 0.94* |
| Hb<br>(g.dL <sup>-1</sup> ) | Normoxia | Saline | 11.23 ± 0.18        | 11.02 ± 0.30   | 10.26 ± 0.34  | 9.54 ± 0.33   | 9.87 ± 0.37   | 10.08 ± 0.35  | 9.89 ± 0.32   | 9.74 ± 0.29   |
|                             |          | MitoQ  | 10.55 ± 0.15        | 10.67 ± 0.35   | 10.11 ± 0.13  | 9.72 ± 0.10   | 9.54 ± 0.09   | 9.53 ± 0.13   | 9.94 ± 0.11   | 9.73 ± 0.10   |
|                             | Hypoxia  | Saline | 11.44 ± 0.16        | 11.88 ± 0.32*  | 11.51 ± 0.12* | 11.69 ± 0.11* | 11.87 ± 0.14* | 12.25 ± 0.12* | 12.52 ± 0.13* | 12.70 ± 0.12* |
|                             |          | MitoQ  | 11.00 ± 0.18        | 11.47 ± 0.33*  | 11.13 ± 0.13* | 10.92 ± 0.11* | 11.19 ± 0.15* | 11.65 ± 0.10* | 11.69 ± 0.10* | 11.98 ± 0.14* |

Values are mean±SEM for maternal and fetal arterial pH, PCO<sub>2</sub>, PO<sub>2</sub>, hemoglobin saturation with oxygen (SatHb) and hemoglobin concentration (Hb) in blood samples taken during the acute hypoxia protocol (A) or with advancing gestational age (B) in normoxic or hypoxic pregnancy with and without maternal treatment with MitoQ. For (A), blood samples were taken at 0, 45 and 75 min of baseline normoxia (N), 5, 15 and 30 min of acute hypoxia (H) and after 30 and 60 min of recovery (R). For (B), blood samples were taken at 105 and 106 days of gestation (before and after onset of MitoQ treatment) and at 5-day intervals until 135 days of gestation. The effects of Hypoxia and MitoQ treatment were determined by two-way ANOVA with repeated measures where appropriate. \* indicates a significant effect of Hypoxia; † indicates a significant effect of MitoQ.

**Table S2. Ovine fetal and adult offspring biometry**

|                                | Fetal offspring |             |                |                 | Adult offspring |               |                |                 |
|--------------------------------|-----------------|-------------|----------------|-----------------|-----------------|---------------|----------------|-----------------|
|                                | Normoxic        | Hypoxic     | Hypoxic +MitoQ | Normoxic +MitoQ | Normoxic        | Hypoxic       | Hypoxic +MitoQ | Normoxic +MitoQ |
| <b>Brain</b>                   |                 |             |                |                 |                 |               |                |                 |
| Absolute (g)                   | 49.9 ± 0.9      | 38.8 ± 2.3* | 43.5 ± 1.7*†   | 48.1 ± 1.3†     | 84.5 ± 1.9      | 89.6 ± 2.0    | 91.5 ± 3.6     | 86.7 ± 2.6      |
| Relative (g.kg <sup>-1</sup> ) | 12.6 ± 0.7      | 14.9 ± 1.0* | 13.3 ± 0.6*    | 11.6 ± 0.4      | 3.4 ± 0.2       | 3.0 ± 0.2     | 2.9 ± 0.2      | 3.1 ± 0.1       |
| <b>Heart</b>                   |                 |             |                |                 |                 |               |                |                 |
| Absolute (g)                   | 34.4 ± 3.5      | 25.4 ± 2.7* | 30.2 ± 2.0*    | 37.0 ± 2.5      | 215.0 ± 11.9    | 239.5 ± 10.7  | 226.5 ± 12.8   | 212.2 ± 12.3    |
| Relative (g.kg <sup>-1</sup> ) | 9.8 ± 0.8       | 9.5 ± 0.3   | 9.1 ± 0.3      | 8.8 ± 0.4       | 8.6 ± 0.3       | 8.0 ± 0.4     | 7.1 ± 0.4†     | 7.6 ± 0.4†      |
| <b>Liver</b>                   |                 |             |                |                 |                 |               |                |                 |
| Absolute (g)                   | 77.1 ± 6.5      | 56.6 ± 7.2* | 68.8 ± 3.4*†   | 102.1 ± 5.6†    | 387.4 ± 19.6    | 422.2 ± 32.2* | 466.1 ± 28.5*  | 374.7 ± 21.6    |
| Relative (g.kg <sup>-1</sup> ) | 21.8 ± 0.9      | 21.0 ± 1.8  | 20.9 ± 0.6     | 24.4 ± 1.1      | 15.5 ± 1.1      | 14.2 ± 1.3    | 14.5 ± 0.6     | 13.8 ± 0.9      |

Values are mean±SEM for fetal and adult absolute organ weights and organ weights relative to body weight in normoxic or hypoxic pregnancy with and without maternal treatment with MitoQ. The effects of Hypoxia and MitoQ treatment were determined by two-way ANOVA. \* indicates a significant effect of Hypoxia. † indicates a significant effect of MitoQ.

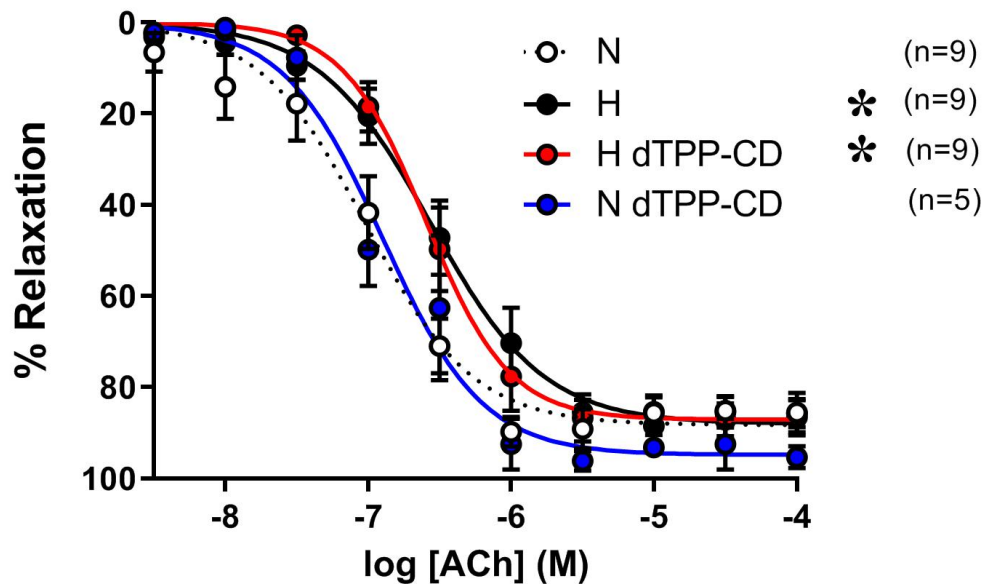

**Figure S1. Effect of chronic hypoxia and MitoQ carrier treatment in the chicken embryo.**

Values are the mean±SEM of the concentration response curves using *in vitro* wire myography to increasing doses of acetylcholine (ACh) in pre-constricted femoral vessels isolated from chicken embryos of untreated normoxic (N, white) or hypoxic (H, black) incubation, or from normoxic (N dTPP-CD, blue) or hypoxic (H dTPP-CD, red) incubation treated with the MitoQ carrier dTPP-CD. The effect of Hypoxia and MitoQ treatment were determined by two-way ANOVA with repeated measures. \* indicates a significant effect of Hypoxia using area above the curve.
